# Supplementary material for: Association of the Comprehensive Care for Joint Replacement Model With Disparities in the Use of Total Hip and Total Knee Replacement
Source: PubMed Central journal article supplement (PMC8164097; doi:10.1001/jamanetworkopen.2021.11858), 2021-05-28
Supplement: jamanetwopen-e2111858-s001.pdf [file jamanetwopen-e2111858-s001.pdf]

## Supplementary Online Content

Thirukumaran CP, Kim Y, Cai X, et al. Association of the Comprehensive Care for Joint Replacement model with disparities in the use of total hip and total knee replacement. *JAMA Netw Open*. 2021;4(5):e2111858. doi:10.1001/jamanetworkopen.2021.11858

**eMethods 1.** Cohort determination criteria

**eMethods 2.** Key variables, model estimation, and sensitivity analysis

**eMethods 3.** Weighting strategy to account for MSA selection probability

**eTable 1.** Chronic conditions for Medicare beneficiaries residing in CJR and non-CJR MSAs with a diagnosis of rheumatoid arthritis/osteoarthritis in 2013

**eTable 2.** Descriptive statistics for Medicare beneficiaries residing in CJR and non-CJR MSAs with a diagnosis of rheumatoid arthritis/osteoarthritis who underwent hip replacements in 2013

**eTable 3.** Descriptive statistics for Medicare beneficiaries residing in CJR and non-CJR MSAs with a diagnosis of osteoarthritis/rheumatoid arthritis who underwent knee replacements in 2013

**eTable 4.** Changes in knee replacements with CJR implementation

**eTable 5.** Adjusted odds ratios for parallel trends test from multivariable models examining the odds of undergoing hip and knee replacement surgeries before the Comprehensive Care for Joint Replacement model was implemented (2013-2015)

**eTable 6.** Full model estimates (adjusted odds ratios) from multivariable models examining the odds of undergoing hip or knee replacement surgeries before and after the Comprehensive Care for Joint Replacement model was implemented (2013-2017)

**eTable 7.** Sensitivity analyses (1-6) - the Comprehensive Care for Joint Replacement model's association with the probability of undergoing hip replacements with respect to White non-dual-eligible beneficiaries (2013-2017)

**eTable 8.** Sensitivity analyses (1-6) - the Comprehensive Care for Joint Replacement model's association with the probability of undergoing knee replacements with respect to White non-dual-eligible beneficiaries (2013-2017)

**eTable 9.** Sensitivity analysis (7) – the Comprehensive Care for Joint Replacement model's effect on the probability of undergoing surgery in the MSA of residence

### eReferences

This supplementary material has been provided by the authors to give readers additional information about their work.

**eMethods 1. Cohort determination criteria**

Inclusion criteria using the Medicare Master Beneficiary Summary (MBSF) File (2013-2017)

- Beneficiaries residing in CJR and non-CJR MSAs
- Fee-for-service beneficiaries identified as those with fee-for-service Medicare coverage for 12 months in the year
- Beneficiaries between 65-99 years of age
- Old age and not end-stage renal disease as a reason for Medicare entitlement
- Beneficiaries who were alive at the end of the calendar year
- Beneficiaries with no missing data for race, dual-eligibility, or sex
- Beneficiaries are attributed to the MSA determined using their zip code at the end of the

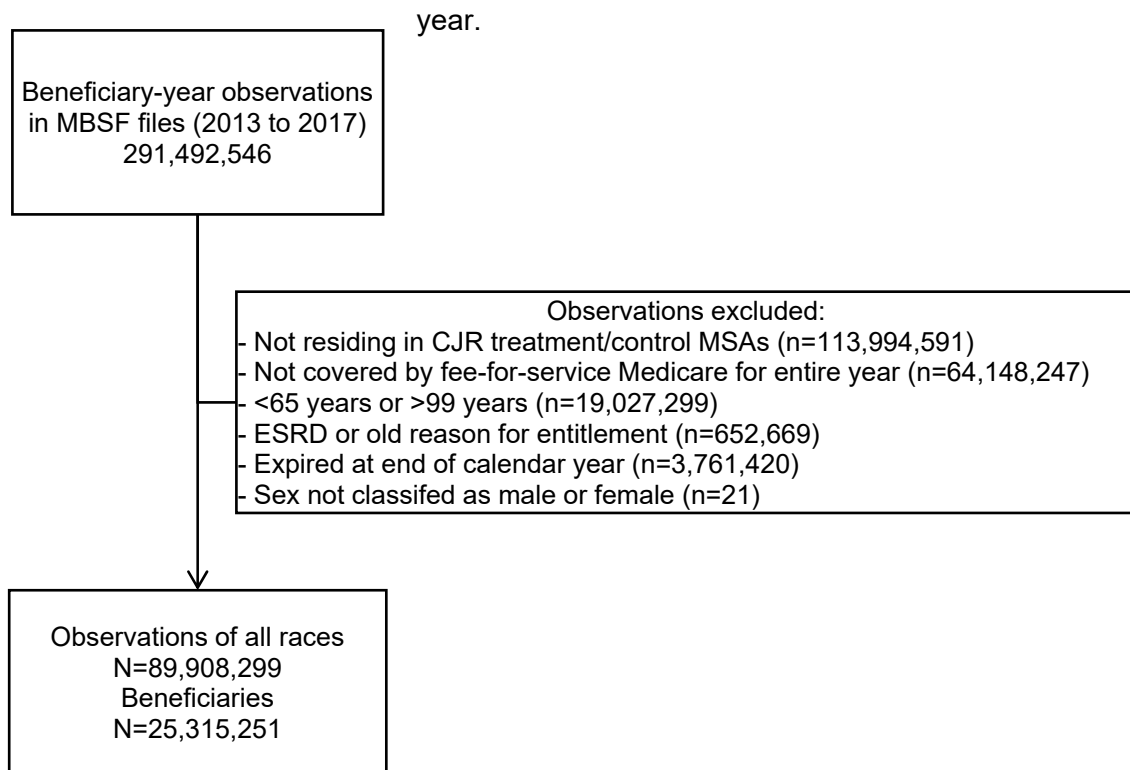

Inclusion criteria using the Medicare Provider Analysis and Review file (MedPAR) (2013-2017)

- Medical Severity Diagnosis Related Group (MS-DRG) codes 469 and 470
- Meet MBSF inclusion criteria listed above
- Short, inpatient stays
- Hospitals reimbursed by the Inpatient Prospective Payment System
- Medicare as the primary payor
- Alive during the 90-day episode
- Non-fracture related, elective stays
- Enrolled in Parts A and B of Medicare at the time of admission
- Hospitals not participating in Model 1 or the risk-bearing phase of Models 2 and 3 of the Bundled Payments for Care Improvement initiative
- Inpatient stays for total hip replacement and total knee replacement
- Non-duplicate inpatient stays
- Qualifying stays that do not occur during the 90-day episode of a previous qualifying stay

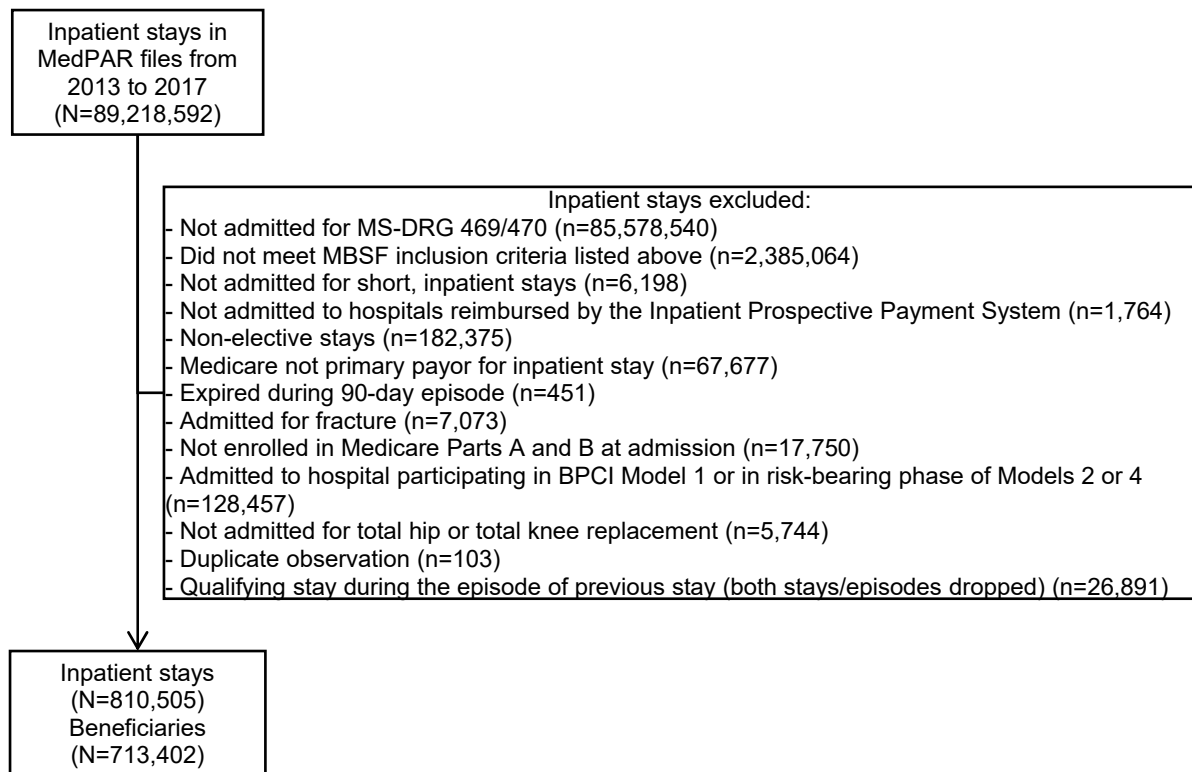

We used the 2013-2017 Medicare Provider Analysis and Review (MedPAR) inpatient claims files<sup>1</sup> to identify inpatient, short-stays for fee-for-service Medicare beneficiaries residing in the CJR and non-CJR MSAs. We used Medical Severity-Diagnosis Related Groups (MS-DRG) 469 and 470 to identify patients undergoing total hip/knee replacements. We excluded non-elective stays, stays for whom Medicare was not the primary payor, if patients expired during the anchor stay or in the 90 days after discharge from the stay (deaths among patients undergoing surgeries in the last quarter of 2017 were identified using 2018 files), and if patients were not enrolled in Medicare Parts A and B at the time of inpatient admission. If a qualifying stay was initiated in a previous qualifying episode, we excluded both episodes.<sup>2</sup> While CJR includes stays for fractures, we excluded these stays from our study because surgeons are unlikely to discriminate between patients in urgent situations.<sup>3</sup> We also excluded stays from hospitals participating in the Bundled Payments for Care Improvement (BPCI) initiative (Model 1 or risk-bearing phase of Models 2 or 4),<sup>4</sup> and those admitted to hospitals not reimbursed by the Inpatient Prospective Payment System. We constructed annual beneficiary-level binary indicators for hip/knee replacements.

Inclusion criteria from merging the MBSF and MedPAR files (2013-2017)

Note: The files were merged at the beneficiary-level. Two binary indicators (one for hip and one for knee replacements) were created to represent whether a beneficiary had one or more qualifying stay during the year.

- Beneficiaries with joint replacements that meet CJR criteria or beneficiaries who did not undergo any joint replacements
- White, Black, and Hispanic beneficiaries
- Beneficiaries with a diagnosis of osteoarthritis / rheumatoid arthritis
- No hip fracture claims

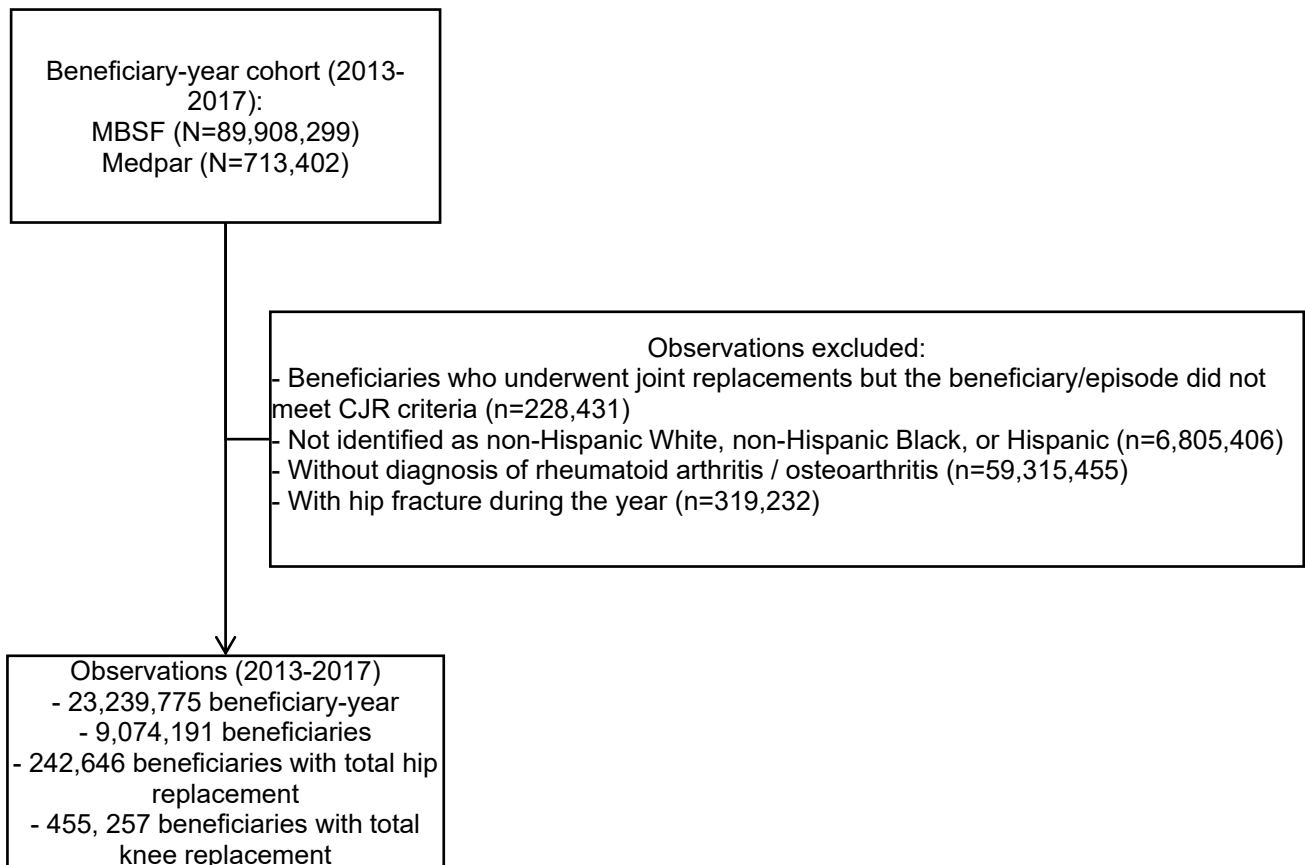

## **eMethods 2.** Key variables, model estimation, and sensitivity analysis

### Key independent variables: Race and dual-eligibility

We identified beneficiary race from the MBSF enrollment files in which the data originates from the Social Security Administration records. We identified dual-eligibility using the state-reported dual-eligible status code (the `dual_elgble_mos_num` variable in the MBSF files).<sup>5</sup> Beneficiaries who met dual-eligibility criteria for twelve months in the year were classified as dual-eligible beneficiaries.

### Test for parallel trends assumption for triple differences models

To assess whether the trends in the use of joint replacements for Medicare beneficiaries from the various race-dual-eligibility groups were parallel in the period before the CJR was implemented (parallel trends assumption for the triple differences models), we estimated the following models (separate for hip and knee replacements). The data for these models was limited to 2013-2015 (pre-CJR period).

$$\begin{aligned} f[E(Y_{pmt})] = & \beta_0 + \beta_1 \times Race\_Dual_{pmt} + \beta_2 \times CJR_m + \beta_3 \times Race\_Dual_{pmt} \times CJR_m + \beta_4 \times Year_t \\ & + \beta_5 \times Year_t \times Race\_Dual_{pmt} + \beta_6 \times Year_t \times CJR_m \\ & + \beta_7 \times Year_t \times Race\_Dual_{pmt} \times CJR_m + \beta_9 \times X_{pmt} + \beta_{10} MSA_m \end{aligned}$$

$Y_{pmt}$  (hip\_dum/knee\_dum): Binary indicator of whether patient  $p$  residing in MSA  $m$  in year  $t$  underwent hip (or knee) replacement

$f(\cdot)$ : Log link function

$CJR_m$  (cjr\_dum): Binary indicator of whether MSA  $m$  was a CJR or non-CJR MSA

$Year_t$  (year): Categorical indicator of the year

$X_{pmt}$  (\$patient\_covariates): Vector of patient covariates include age, sex, and 24 chronic conditions identified from the MBSF-CC file

$MSA_m$  (msa): Fixed effects of MSA represented using a categorical indicator

$Race\_Dual_{pmt}$  (race\_dual): A categorical indicator of race and dual-eligibility (White non-dual-eligible, White dual-eligible, Black non-dual-eligible, Black dual-eligible, Hispanic non-dual-eligible, and Hispanic dual-eligible)

We used the Wald test to separately test for the significance of  $\beta_5$ ,  $\beta_6$ , and  $\beta_7$ . A p-value <0.05 on the test for any of the three estimates in a model represented a violation of the parallel trends assumption.

### Results of the parallel trends tests for triple differences models

The parallel trends tests were significant for both hip and knee replacements.

### Model estimation for triple differences models

We estimated the following triple differences models (separate for hip and knee replacements) to assess the differential effect of the CJR. The triple differences approach includes the estimation of three differences: First, the difference between the pre- and post-CJR rates for each race-dual-eligibility group in CJR and non-CJR MSAs (difference 1). Second, the difference in difference 1 between CJR and non-CJR MSAs for each race-dual-eligibility group (difference 2). Third, the difference in difference 2 between each race-dual-eligibility group (except for White non-dual-eligible beneficiaries) and White non-dual-eligible beneficiaries (difference 3).

Because of the violation of the parallel trends assumption, we included interactions of  $Year_t$  with  $Race\_Dual_{pmt}$  and  $CJR_m$  to account for the differential trends in the pre-CJR period.<sup>6</sup>

<sup>7</sup> This specification is similar to Comparative Interrupted Time Series models which do not impose the parallel trends assumption.<sup>8</sup>

$$\begin{aligned}
f[E(Y_{pmt})] = & \beta_0 + \beta_1 \times Race\_Dual_{pmt} + \beta_2 \times CJR_m + \beta_3 \times Race\_Dual_{pmt} \times CJR_m + \beta_4 \times Year_t \\
& + \beta_5 \times Post_t + \beta_6 \times Post_t \times Race\_Dual_{pmt} + \beta_7 \times Post_t \times CJR_m \\
& + \beta_8 \times Post_t \times Race\_Dual_{pmt} \times CJR_m + \beta_9 \times X_{pmt} + \beta_{10} MSA_m \\
& + \beta_{11} \times Year_t \times Race\_Dual_{pmt} + \beta_{12} \times Year_t \times CJR_m \\
& + \beta_{13} \times Year_t \times Race\_Dual_{pmt} \times CJR_m
\end{aligned}$$

$Post_t$  is a binary indicator for the CJR implementation phase (Years 2013-2015=0, year 2017=1). The interpretation of other terms is similar to those described previously. During model estimation  $Year_t=2017$  is excluded from the model estimates due to collinearity with the  $Post_t=1$  category.  $\beta_8$  is the triple differences estimate for CJR's association with disparities for each race/ethnic-dual-eligibility group as compared to White non-dual-eligible beneficiaries.

We used Stata/MP 16.1 for Unix to estimate the models. We used Stata's margins and lincom commands to test the study hypotheses.

### Sensitivity analysis

We checked for the robustness of the main findings using the following strategies. First, we re-estimated the main models using the cohort of 75 MSAs (intention-to-treat analysis) that were originally mandated to participate in the CJR.<sup>2</sup> We used 121 control MSAs that originally met CJR inclusion criteria but were not selected for participation through randomization.

Second, because the Research Triangle Institute (RTI) indicator for race is more sensitive for the identification of Hispanic beneficiaries, we re-estimated the main models using the RTI indicator. This indicator uses a combination of names and geographic locations to improve the identification of Hispanic and Asians/Pacific Islander beneficiaries in comparison to their identification from the Social Security Administration records.<sup>9, 10</sup> Third, we redefined dual-eligibility using the Medicare entitlement/buy-in code, which identifies dual-eligible beneficiaries as those with state buy-in for Parts A or B or both of Medicare.<sup>5</sup> Fourth, the intent to implement



the CJR was published in July 2015, and the rule was finalized in November 2015. Because changes in joint replacement use patterns may have set-in in advance of the April 2016 start date, we re-estimated the main models by including data from 2016 in the post-CJR period.

Fifth, to refine the identification of elective surgeries, we used Medicare's definition for elective joint replacements which was designed for identifying the cohort for risk-standardized readmission and complication rates.<sup>11, 12</sup> This approach uses ICD-9-PCS and ICD-10-PCS codes instead of MS-DRGs (used by the CJR) for identification of joint replacements.

Sixth, to examine the effects of race and dual-eligibility separately, we estimated the differential effect models by interacting race (instead of race-dual-eligibility combination) with the CJR/non-CJR MSA and CJR phase indicators. We conducted similar analysis by interacting dual-eligibility with CJR/non-CJR MSA and CJR phase indicators.

Finally, to examine whether racial minorities may have been directed to undergo joint replacements in MSAs not participating in the CJR, we estimated multivariable logistic regression models that modeled a binary indicator of whether the patient underwent surgery in his/her residence MSA. This analysis was limited to beneficiaries residing in CJR MSAs. The key independent variables were the CJR phase, the race-dual-eligibility indicator, and the interactions between these variables.

**eMethods 3.** Weighting strategy to account for MSA selection probability

We used the method by the Lewin Group to account for an MSA’s probability of selection into the treatment (CJR MSAs) or control (non-CJR MSAs) group.<sup>13</sup> In this approach, the CJR MSAs were assigned a weight of 1 and the non-CJR MSAs were assigned weights to represent the CJR MSAs. These weights for the non-CJR MSAs were obtained by dividing the number of CJR MSAs in each of the 8 strata (constructed by the CMS using quartiles of pre-period episode spending and whether the MSA had above or below median population) by the number of non-CJR MSAs in that stratum. These weights were then used in our regression models using Stata’s pweight option which are “weights that denote the inverse of the probability that the observation is included because of the sampling design.”<sup>14</sup>

**Exhibit E-9: CMS’ stratified random sample of CJR MSAs and analytic weights**

| MSA population              | MSA sampling stratum | MSA average episode payment     | # MSAs eligible for sampling | CJR sample |                                     |            | Control group sample |                                         |                      |
|-----------------------------|----------------------|---------------------------------|------------------------------|------------|-------------------------------------|------------|----------------------|-----------------------------------------|----------------------|
|                             |                      |                                 |                              | # CJR MSAs | Proportion of MSAs selected for CJR | CJR weight | # Control group MSAs | Proportion of MSAs in the control group | Control group weight |
| Less than median population | 1                    | Lowest quartile                 | 25                           | 8          | 32.0%                               | 1.0        | 17                   | 68.0%                                   | 8/17                 |
|                             | 2                    | 2 <sup>nd</sup> lowest quartile | 18                           | 6          | 33.3%                               | 1.0        | 12                   | 66.7%                                   | 6/12                 |
|                             | 3                    | 3 <sup>rd</sup> lowest quartile | 19                           | 8          | 42.1%                               | 1.0        | 11                   | 57.9%                                   | 8/11                 |
|                             | 4                    | Highest quartile                | 22                           | 11         | 50.0%                               | 1.0        | 11                   | 50.0%                                   | 11/11                |
| More than median population | 5                    | Lowest quartile                 | 15                           | 5          | 33.3%                               | 1.0        | 10                   | 66.7%                                   | 5/10                 |
|                             | 6                    | 2 <sup>nd</sup> lowest quartile | 28                           | 10         | 35.7%                               | 1.0        | 18                   | 64.3%                                   | 10/18                |
|                             | 7                    | 3 <sup>rd</sup> lowest quartile | 22                           | 9          | 40.9%                               | 1.0        | 13                   | 59.1%                                   | 9/13                 |
|                             | 8                    | Highest quartile                | 22                           | 10         | 45.5%                               | 1.0        | 12                   | 54.5%                                   | 10/12                |
| Total                       |                      |                                 | 171                          | 67         |                                     |            | 104                  |                                         |                      |

*Source:* Lewin analysis of the Medicare Program Comprehensive Care for Joint Replacement Payment Model for Acute Care Hospitals Furnishing Lower Extremity Joint Replacement Services; A Final Rule by the Centers for Medicare & Medicaid Services, 80 FR 73273 (November 24, 2015) (codified at 42 CFR 510).

*Note:* MSA = metropolitan statistical area.

Source: Lewin Group, CMS Comprehensive Care for Joint Replacements Model: Performance Year 2 Evaluation Report – Appendices, June 2019, Page 29.

**eTable 1.** Chronic conditions for Medicare beneficiaries residing in CJR and non-CJR MSAs with a diagnosis of rheumatoid arthritis/osteoarthritis in 2013

|                                                      | Non-CJR MSAs            | CJR MSAs                | Total                   | p-value <sup>c</sup> |
|------------------------------------------------------|-------------------------|-------------------------|-------------------------|----------------------|
| <b>Patients<sup>a</sup></b>                          |                         |                         |                         |                      |
| N                                                    | 2,421,848               | 2,025,357               | 4,447,205               |                      |
| Chronic Conditions <sup>b</sup> : % (95% CI)         |                         |                         |                         |                      |
| <i>Acute myocardial infarction</i>                   | 0.87<br>(0.86, 0.88)    | 0.87<br>(0.86, 0.88)    | 0.87<br>(0.86, 0.88)    | 0.95                 |
| <i>Alzheimer's disease and its related dementias</i> | 14.84<br>(14.79, 14.88) | 16.17<br>(16.12, 16.22) | 15.44<br>(15.41, 15.48) | <0.001               |
| <i>Anemia</i>                                        | 32.08<br>(32.02, 32.14) | 37.53<br>(37.47, 37.60) | 34.56<br>(34.52, 34.61) | <0.001               |
| <i>Asthma</i>                                        | 7.46<br>(7.43, 7.49)    | 7.66<br>(7.62, 7.69)    | 7.55<br>(7.53, 7.58)    | <0.001               |
| <i>Atrial fibrillation</i>                           | 12.07<br>(12.03, 12.11) | 12.15<br>(12.10, 12.19) | 12.10<br>(12.07, 12.14) | 0.015                |
| <i>Benign prostatic hyperplasia</i>                  | 8.44<br>(8.40, 8.47)    | 9.45<br>(9.41, 9.49)    | 8.90<br>(8.87, 8.93)    | <0.001               |
| <i>Breast cancer</i>                                 | 4.64<br>(4.61, 4.67)    | 4.83<br>(4.80, 4.86)    | 4.73<br>(4.71, 4.75)    | <0.001               |
| <i>Cataract</i>                                      | 24.37<br>(24.32, 24.43) | 25.16<br>(25.10, 25.22) | 24.73<br>(24.69, 24.77) | <0.001               |
| <i>Chronic Kidney Disease</i>                        | 21.43<br>(21.38, 21.49) | 21.10<br>(21.04, 21.15) | 21.28<br>(21.24, 21.32) | <0.001               |
| <i>Chronic Obstructive Pulmonary Disease</i>         | 14.47<br>(14.43, 14.52) | 14.62<br>(14.57, 14.67) | 14.54<br>(14.51, 14.58) | <0.001               |
| <i>Colorectal cancer</i>                             | 1.53<br>(1.51, 1.54)    | 1.58<br>(1.56, 1.60)    | 1.55<br>(1.54, 1.56)    | <0.001               |
| <i>Congestive Heart Failure</i>                      | 19.47<br>(19.42, 19.52) | 21.03<br>(20.98, 21.09) | 20.18<br>(20.15, 20.22) | <0.001               |
| <i>Depression</i>                                    | 20.34<br>(20.29, 20.39) | 20.97<br>(20.92, 21.03) | 20.63<br>(20.59, 20.67) | <0.001               |
| <i>Diabetes</i>                                      | 31.29<br>(31.24, 31.35) | 34.18<br>(34.11, 34.25) | 32.61<br>(32.57, 32.65) | <0.001               |
| <i>Endometrial cancer</i>                            | 0.42<br>(0.42, 0.43)    | 0.46<br>(0.45, 0.47)    | 0.44<br>(0.43, 0.44)    | <0.001               |
| <i>Glaucoma</i>                                      | 13.43<br>(13.39, 13.48) | 14.71<br>(14.66, 14.76) | 14.02<br>(13.98, 14.05) | <0.001               |
| <i>Hyperlipidemia</i>                                | 60.38<br>(60.32, 60.45) | 61.92<br>(61.86, 61.99) | 61.09<br>(61.04, 61.13) | <0.001               |
| <i>Hypertension</i>                                  | 74.43<br>(74.37, 74.48) | 74.50<br>(74.44, 74.56) | 74.46<br>(74.42, 74.50) | 0.09                 |
| <i>Hypothyroidism</i>                                | 21.14<br>(21.09, 21.19) | 21.61<br>(21.55, 21.66) | 21.35<br>(21.32, 21.39) | <0.001               |
| <i>Ischemic Heart Disease</i>                        | 37.78<br>(37.72, 37.84) | 41.62<br>(41.55, 41.68) | 39.53<br>(39.48, 39.57) | <0.001               |
| <i>Lung cancer</i>                                   | 1.04<br>(1.02, 1.05)    | 1.06<br>(1.04, 1.07)    | 1.05<br>(1.04, 1.06)    | 0.03                 |
| <i>Osteoporosis</i>                                  | 11.32<br>(11.28, 11.36) | 12.69<br>(12.64, 12.73) | 11.94<br>(11.91, 11.97) | <0.001               |
| <i>Prostate cancer</i>                               | 3.96                    | 3.96                    | 3.96                    | 0.75                 |

|                                          | <b>Non-CJR MSAs</b>  | <b>CJR MSAs</b>      | <b>Total</b>         | <b>p-value<sup>c</sup></b> |
|------------------------------------------|----------------------|----------------------|----------------------|----------------------------|
|                                          | (3.94, 3.99)         | (3.93, 3.99)         | (3.94, 3.98)         |                            |
| <i>Stroke/ Transient ischemic attack</i> | 5.44<br>(5.41, 5.47) | 5.52<br>(5.49, 5.55) | 5.48<br>(5.45, 5.50) | <0.001                     |

Abbreviations: CJR: Comprehensive Care for Joint Replacement Model; MSA: Metropolitan Statistical Area; %: Column percentage; CI: Confidence Interval

Note: <sup>a</sup> Data from the 2013 Master Beneficiary Summary File – Base and Chronic Conditions Segment; <sup>b</sup> Chronic Conditions present at the end of the year as determined by the claims criteria; <sup>c</sup> p-values for Kruskal-Wallis tests (for continuous variables) or chi-square tests (for categorical variables) that test for the distribution of characteristics across CJR and non-CJR MSAs.

**eTable 2.** Descriptive statistics for Medicare beneficiaries residing in CJR and non-CJR MSAs with a diagnosis of rheumatoid arthritis/osteoarthritis who underwent hip replacements in 2013

|                                                      | Non-CJR MSAs            | CJR MSAs                | Total                   | p-value <sup>c</sup> |
|------------------------------------------------------|-------------------------|-------------------------|-------------------------|----------------------|
| <b>Patients<sup>a</sup></b>                          |                         |                         |                         |                      |
| N                                                    | 25,682                  | 20,425                  | 46,107                  |                      |
| Age in years: Mean (SD)                              | 74.57 (6.54)            | 74.81 (6.65)            | 74.68 (6.59)            | <0.001               |
| Female: % (95% CI)                                   | 62.27<br>(61.67, 62.86) | 62.11<br>(61.44, 62.78) | 62.20<br>(61.75, 62.64) | 0.73                 |
| Race: % (95% CI)                                     |                         |                         |                         | <0.001               |
| <i>White</i>                                         | 95.27<br>(95.01, 95.53) | 94.76<br>(94.45, 95.06) | 95.05<br>(94.84, 95.24) |                      |
| <i>Black</i>                                         | 4.52<br>(4.27, 4.78)    | 4.68<br>(4.39, 4.97)    | 4.59<br>(4.40, 4.78)    |                      |
| <i>Hispanic</i>                                      | 0.21<br>(0.15, 0.27)    | 0.56<br>(0.47, 0.68)    | 0.36<br>(0.31, 0.42)    |                      |
| Dual-eligible: % (95% CI)                            | 3.89<br>(3.66, 4.13)    | 4.41<br>(4.13, 4.70)    | 4.12<br>(3.94, 4.30)    | 0.01                 |
| Race-Dual-eligibility: % (95% CI)                    |                         |                         |                         | <0.001               |
| <i>White non-dual</i>                                | 92.26<br>(91.93, 92.58) | 91.53<br>(91.14, 91.91) | 91.94<br>(91.68, 92.18) |                      |
| <i>White dual</i>                                    | 3.01<br>(2.81, 3.23)    | 3.23<br>(2.99, 3.48)    | 3.11<br>(2.95, 3.27)    |                      |
| <i>Black non-dual</i>                                | 3.71<br>(3.49, 3.95)    | 3.87<br>(3.61, 4.15)    | 3.78<br>(3.61, 3.96)    |                      |
| <i>Black dual</i>                                    | 0.81<br>(0.70, 0.92)    | 0.80<br>(0.69, 0.94)    | 0.80<br>(0.73, 0.89)    |                      |
| <i>Hispanic non-dual</i>                             | 0.14<br>(0.09, 0.19)    | 0.19<br>(0.14, 0.26)    | 0.16<br>(0.13, 0.20)    |                      |
| <i>Hispanic dual</i>                                 | 0.07<br>(0.04, 0.11)    | 0.37<br>(0.29, 0.47)    | 0.20<br>(0.16, 0.25)    |                      |
| Chronic conditions <sup>b</sup> : % (95% CI)         |                         |                         |                         |                      |
| <i>Acute myocardial infarction</i>                   | 0.69<br>(0.59, 0.79)    | 0.68<br>(0.57, 0.80)    | 0.68<br>(0.61, 0.76)    | 0.95                 |
| <i>Alzheimer's disease and its related dementias</i> | 5.24<br>(4.97, 5.52)    | 5.63<br>(5.32, 5.96)    | 5.41<br>(5.21, 5.62)    | 0.06                 |
| <i>Anemia</i>                                        | 63.53<br>(62.93, 64.12) | 69.66<br>(69.03, 70.29) | 66.25<br>(65.81, 66.68) | <0.001               |
| <i>Asthma</i>                                        | 10.32<br>(9.95, 10.70)  | 10.21<br>(9.80, 10.63)  | 10.27<br>(9.99, 10.55)  | 0.70                 |
| <i>Atrial fibrillation</i>                           | 11.55<br>(11.16, 11.94) | 11.98<br>(11.54, 12.43) | 11.74<br>(11.45, 12.04) | 0.15                 |
| <i>Benign prostatic hyperplasia</i>                  | 12.70<br>(12.30, 13.11) | 14.14<br>(13.67, 14.63) | 13.34<br>(13.03, 13.65) | <0.001               |
| <i>Breast cancer</i>                                 | 6.53<br>(6.23, 6.84)    | 6.26<br>(5.93, 6.60)    | 6.41<br>(6.19, 6.64)    | 0.24                 |
| <i>Cataract</i>                                      | 24.94<br>(24.42, 25.48) | 25.65<br>(25.05, 26.25) | 25.25<br>(24.86, 25.65) | 0.09                 |
| <i>Chronic Kidney Disease</i>                        | 17.76                   | 17.72                   | 17.75                   | 0.91                 |

|                                              | Non-CJR MSAs            | CJR MSAs                | Total                   | p-value <sup>c</sup> |
|----------------------------------------------|-------------------------|-------------------------|-------------------------|----------------------|
|                                              | (17.30, 18.24)          | (17.20, 18.25)          | (17.40, 18.10)          |                      |
| <i>Chronic Obstructive Pulmonary Disease</i> | 13.23<br>(12.82, 13.65) | 12.90<br>(12.44, 13.37) | 13.08<br>(12.78, 13.40) | 0.30                 |
| <i>Colorectal cancer</i>                     | 1.95<br>(1.79, 2.13)    | 1.95<br>(1.76, 2.15)    | 1.95<br>(1.83, 2.08)    | 0.99                 |
| <i>Congestive Heart Failure</i>              | 12.17<br>(11.77, 12.57) | 13.15<br>(12.69, 13.62) | 12.60<br>(12.30, 12.91) | 0.002                |
| <i>Depression</i>                            | 22.04<br>(21.53, 22.55) | 21.45<br>(20.89, 22.02) | 21.78<br>(21.40, 22.16) | 0.13                 |
| <i>Diabetes</i>                              | 22.97<br>(22.46, 23.49) | 24.65<br>(24.06, 25.24) | 23.71<br>(23.33, 24.11) | <0.001               |
| <i>Endometrial cancer</i>                    | 0.85<br>(0.74, 0.97)    | 0.88<br>(0.76, 1.02)    | 0.87<br>(0.78, 0.95)    | 0.74                 |
| <i>Glaucoma</i>                              | 11.93<br>(11.54, 12.34) | 12.72<br>(12.27, 13.18) | 12.28<br>(11.98, 12.59) | 0.01                 |
| <i>Hyperlipidemia</i>                        | 69.69<br>(69.12, 70.25) | 70.29<br>(69.65, 70.91) | 69.95<br>(69.53, 70.37) | 0.16                 |
| <i>Hypertension</i>                          | 80.47<br>(79.98, 80.95) | 80.03<br>(79.48, 80.58) | 80.28<br>(79.91, 80.64) | 0.24                 |
| <i>Hypothyroidism</i>                        | 23.65<br>(23.14, 24.18) | 24.09<br>(23.51, 24.69) | 23.85<br>(23.46, 24.24) | 0.27                 |
| <i>Ischemic Heart Disease</i>                | 33.56<br>(32.98, 34.14) | 36.70<br>(36.03, 37.36) | 34.95<br>(34.51, 35.38) | <0.001               |
| <i>Lung cancer</i>                           | 0.93<br>(0.82, 1.06)    | 1.05<br>(0.92, 1.20)    | 0.99<br>(0.90, 1.08)    | 0.20                 |
| <i>Osteoporosis</i>                          | 12.91<br>(12.50, 13.32) | 13.63<br>(13.16, 14.10) | 13.23<br>(12.92, 13.54) | 0.02                 |
| <i>Prostate cancer</i>                       | 5.64<br>(5.36, 5.93)    | 5.65<br>(5.34, 5.98)    | 5.65<br>(5.44, 5.86)    | 0.97                 |
| <i>Stroke/ Transient ischemic attack</i>     | 2.98<br>(2.77, 3.19)    | 3.37<br>(3.13, 3.63)    | 3.15<br>(3.00, 3.32)    | 0.02                 |

Abbreviations: CJR: Comprehensive Care for Joint Replacement Model; MSA: Metropolitan Statistical Area; N: Number; %: Column percentage; SD: Standard deviation; CI: Confidence Interval

Notes: <sup>a</sup> Data from the 2013 Master Beneficiary Summary File – Base Segment; <sup>b</sup> Data from the 2013 Master Beneficiary Summary File – Chronic Conditions Segment; <sup>c</sup> p-values for Kruskal-Wallis tests (for continuous variables) or chi-square tests (for categorical variables) that test for the distribution of characteristics across CJR and non-CJR MSAs.

**eTable 3.** Descriptive statistics for Medicare beneficiaries residing in CJR and non-CJR MSAs with a diagnosis of osteoarthritis/rheumatoid arthritis who underwent knee replacements in 2013

|                                                      | Non-CJR MSA             | CJR MSA                 | Total                   | p-value <sup>c</sup> |
|------------------------------------------------------|-------------------------|-------------------------|-------------------------|----------------------|
| <b>Patients<sup>a</sup></b>                          |                         |                         |                         |                      |
| N                                                    | 53,977                  | 40,574                  | 94,551                  |                      |
| Age in years: Mean (SD)                              | 73.92 (6.07)            | 74.13 (6.12)            | 74.01 (6.09)            | <0.001               |
| Female: % (95% CI)                                   | 64.85<br>(64.45, 65.25) | 65.63<br>(65.16, 66.09) | 65.18<br>(64.88, 65.49) | 0.01                 |
| Race: % (95% CI)                                     |                         |                         |                         | <0.001               |
| <i>White</i>                                         | 93.79<br>(93.58, 93.99) | 92.56<br>(92.30, 92.82) | 93.26<br>(93.10, 93.42) |                      |
| <i>Black</i>                                         | 5.27<br>(5.09, 5.46)    | 5.69<br>(5.47, 5.92)    | 5.45<br>(5.31, 5.60)    |                      |
| <i>Hispanic</i>                                      | 0.94<br>(0.86, 1.02)    | 1.74<br>(1.62, 1.88)    | 1.28<br>(1.21, 1.36)    |                      |
| Dual-eligible: % (95% CI)                            | 5.33<br>(5.15, 5.53)    | 6.66<br>(6.42, 6.91)    | 5.90<br>(5.76, 6.06)    | <0.001               |
| Race-Dual-eligibility: % (95% CI)                    |                         |                         |                         | <0.001               |
| <i>White non-dual</i>                                | 90.03<br>(89.77, 90.28) | 88.38<br>(88.06, 88.69) | 89.32<br>(89.12, 89.51) |                      |
| <i>White dual</i>                                    | 3.77<br>(3.61, 3.93)    | 4.18<br>(3.99, 4.38)    | 3.95<br>(3.82, 4.07)    |                      |
| <i>Black non-dual</i>                                | 4.32<br>(4.15, 4.50)    | 4.59<br>(4.39, 4.79)    | 4.43<br>(4.30, 4.57)    |                      |
| <i>Black dual</i>                                    | 0.95<br>(0.87, 1.04)    | 1.11<br>(1.01, 1.21)    | 1.02<br>(0.96, 1.08)    |                      |
| <i>Hispanic non-dual</i>                             | 0.32<br>(0.27, 0.37)    | 0.37<br>(0.32, 0.44)    | 0.34<br>(0.31, 0.38)    |                      |
| <i>Hispanic dual</i>                                 | 0.62<br>(0.55, 0.68)    | 1.37<br>(1.26, 1.49)    | 0.94<br>(0.88, 1.00)    |                      |
| Chronic conditions <sup>b</sup> : % (95% CI)         |                         |                         |                         |                      |
| <i>Acute myocardial infarction</i>                   | 0.48<br>(0.42, 0.54)    | 0.48<br>(0.41, 0.55)    | 0.48<br>(0.44, 0.52)    | 1.00                 |
| <i>Alzheimer's disease and its related dementias</i> | 4.78<br>(4.60, 4.97)    | 5.14<br>(4.93, 5.36)    | 4.94<br>(4.80, 5.08)    | 0.011                |
| <i>Anemia</i>                                        | 58.95<br>(58.53, 59.36) | 65.86<br>(65.39, 66.32) | 61.91<br>(61.60, 62.22) | <0.001               |
| <i>Asthma</i>                                        | 11.99<br>(11.72, 12.27) | 11.74<br>(11.43, 12.06) | 11.89<br>(11.68, 12.09) | 0.24                 |
| <i>Atrial fibrillation</i>                           | 11.41<br>(11.14, 11.68) | 11.69<br>(11.38, 12.01) | 11.53<br>(11.33, 11.74) | 0.18                 |
| <i>Benign prostatic hyperplasia</i>                  | 12.19<br>(11.92, 12.47) | 12.91<br>(12.59, 13.24) | 12.50<br>(12.29, 12.71) | 0.001                |
| <i>Breast cancer</i>                                 | 6.30<br>(6.10, 6.51)    | 6.45<br>(6.22, 6.70)    | 6.37<br>(6.21, 6.53)    | 0.35                 |
| <i>Cataract</i>                                      | 25.60<br>(25.23, 25.97) | 26.13<br>(25.71, 26.57) | 25.83<br>(25.55, 26.11) | 0.06                 |
| <i>Chronic Kidney Disease</i>                        | 18.22                   | 18.57                   | 18.37                   | 0.17                 |

|                                              | Non-CJR MSA             | CJR MSA                 | Total                   | p-value <sup>c</sup> |
|----------------------------------------------|-------------------------|-------------------------|-------------------------|----------------------|
|                                              | (17.89, 18.55)          | (18.19, 18.95)          | (18.12, 18.62)          |                      |
| <i>Chronic Obstructive Pulmonary Disease</i> | 11.58<br>(11.31, 11.85) | 11.79<br>(11.48, 12.11) | 11.67<br>(11.47, 11.88) | 0.32                 |
| <i>Colorectal cancer</i>                     | 1.62<br>(1.51, 1.73)    | 1.56<br>(1.44, 1.69)    | 1.59<br>(1.51, 1.68)    | 0.47                 |
| <i>Congestive Heart Failure</i>              | 11.82<br>(11.54, 12.09) | 12.92<br>(12.60, 13.25) | 12.29<br>(12.08, 12.50) | <0.001               |
| <i>Depression</i>                            | 23.88<br>(23.52, 24.24) | 24.57<br>(24.15, 24.99) | 24.17<br>(23.90, 24.45) | 0.01                 |
| <i>Diabetes</i>                              | 29.58<br>(29.20, 29.97) | 30.26<br>(29.81, 30.71) | 29.87<br>(29.58, 30.16) | 0.02                 |
| <i>Endometrial cancer</i>                    | 0.82<br>(0.74, 0.90)    | 0.82<br>(0.73, 0.91)    | 0.82<br>(0.76, 0.88)    | 0.98                 |
| <i>Glaucoma</i>                              | 12.43<br>(12.15, 12.71) | 12.66<br>(12.34, 12.99) | 12.53<br>(12.32, 12.74) | 0.28                 |
| <i>Hyperlipidemia</i>                        | 72.68<br>(72.30, 73.06) | 73.21<br>(72.78, 73.64) | 72.91<br>(72.62, 73.19) | 0.07                 |
| <i>Hypertension</i>                          | 84.84<br>(84.53, 85.14) | 84.67<br>(84.32, 85.02) | 84.77<br>(84.54, 84.99) | 0.48                 |
| <i>Hypothyroidism</i>                        | 25.30<br>(24.93, 25.67) | 25.79<br>(25.36, 26.22) | 25.51<br>(25.23, 25.79) | 0.09                 |
| <i>Ischemic Heart Disease</i>                | 34.03<br>(33.63, 34.43) | 36.83<br>(36.36, 37.30) | 35.23<br>(34.93, 35.54) | <0.001               |
| <i>Lung cancer</i>                           | 0.65<br>(0.58, 0.72)    | 0.66<br>(0.58, 0.74)    | 0.65<br>(0.60, 0.71)    | 0.86                 |
| <i>Osteoporosis</i>                          | 11.59<br>(11.32, 11.87) | 12.88<br>(12.56, 13.21) | 12.15<br>(11.94, 12.36) | <0.001               |
| <i>Prostate cancer</i>                       | 4.99<br>(4.81, 5.18)    | 4.49<br>(4.29, 4.69)    | 4.78<br>(4.64, 4.91)    | <0.001               |
| <i>Stroke/ Transient ischemic attack</i>     | 3.18<br>(3.03, 3.33)    | 3.14<br>(2.97, 3.32)    | 3.16<br>(3.05, 3.28)    | 0.75                 |

Abbreviations: CJR: Comprehensive Care for Joint Replacement Model; MSA: Metropolitan Statistical Area; N: Number; %: Column percentage; SD: Standard deviation; CI: Confidence Interval

Notes: <sup>a</sup> Data from the 2013 Master Beneficiary Summary File – Base Segment; <sup>b</sup> Data from the 2013 Master Beneficiary Summary File – Chronic Conditions Segment; <sup>c</sup> p-values for Kruskal-Wallis tests (for continuous variables) or chi-square tests (for categorical variables) that test for the distribution of characteristics across CJR and non-CJR MSAs.



**eTable 4.** Changes in knee replacements with CJR implementation

Panel A: Unadjusted relative changes in knee replacements with CJR implementation (estimates from Table 2; column A)

| Knee replacements | CJR MSAs |       |          |
|-------------------|----------|-------|----------|
|                   | Before   | After | % change |
| White non-dual    | 2.28     | 2.38  | 4.39     |
| White dual        | 0.77     | 0.81  | 5.19     |
| Black non-dual    | 1.65     | 1.63  | -1.21    |
| Black dual        | 0.74     | 0.68  | -8.11    |
| Hispanic non-dual | 1.30     | 1.41  | 8.46     |
| Hispanic dual     | 0.90     | 1.06  | 17.78    |

Panel B: Estimated changes in knee replacement counts for Black non-dual- and dual-eligible beneficiaries

|                                                                 | CJR MSA              |                      | Non-CJR MSA          |                      | Difference |
|-----------------------------------------------------------------|----------------------|----------------------|----------------------|----------------------|------------|
|                                                                 | Before               | After                | Before               | After                |            |
| <b>Black non-dual-eligible</b>                                  |                      |                      |                      |                      |            |
| Population count (N)                                            | 112,851              | 123,141              | 157,085              | 170,417              |            |
| Adjusted probability with 95% CI (%)                            | 2.14<br>(2.00, 2.27) | 2.13<br>(1.97, 2.29) | 0.97<br>(0.93, 1.01) | 1.11<br>(1.05, 1.17) |            |
| Surgery count (N)                                               | 2,412                | 2,619                | 1,519                | 1,890                |            |
| Difference (After – Before for each MSA treatment status group) |                      | 207                  |                      | 370                  | -163       |
| % difference with respect to <i>Before</i> volume in CJR MSAs   |                      |                      |                      |                      | -6.77%     |
| <b>Black dual-eligible</b>                                      |                      |                      |                      |                      |            |
| Population count (N)                                            | 60,709               | 57,808               | 71,674               | 68,567               |            |
| Adjusted probability with 95% CI (%)                            | 1.18<br>(1.09, 1.28) | 1.11<br>(0.97, 1.25) | 0.47<br>(0.44, 0.50) | 0.58<br>(0.51, 0.64) |            |
| Surgery count (N)                                               | 719                  | 643                  | 337                  | 396                  |            |
| Difference (After – Before for each MSA treatment status group) |                      | -76                  |                      | 59                   | -134       |
| % difference with respect to <i>Before</i> volume in CJR MSAs   |                      |                      |                      |                      | -18.70%    |

Abbreviations: CJR: Comprehensive Care for Joint Replacement model; MSA: Metropolitan Statistical Area; N: Number; %: Percentage; CI: Confidence Interval

Note: Estimates rounded to the nearest two decimals or the whole number.

**eTable 5.** Adjusted odds ratios for parallel trends test from multivariable models examining the odds of undergoing hip and knee replacement surgeries before the Comprehensive Care for Joint Replacement model was implemented (2013-2015)

|                                                     | <b>Hip Replacement</b>     | <b>Knee Replacement</b>    |
|-----------------------------------------------------|----------------------------|----------------------------|
|                                                     | <i>Odds Ratio [95% CI]</i> | <i>Odds Ratio [95% CI]</i> |
| <b>Year</b>                                         |                            |                            |
| 2013                                                | Ref                        | Ref                        |
| 2014                                                | 1.04*** [1.02,1.06]        | 0.97*** [0.96,0.98]        |
| 2015                                                | 1.06*** [1.04,1.08]        | 0.97*** [0.95,0.98]        |
| <b>MSA Treatment Status</b>                         |                            |                            |
| Non-CJR MSA                                         | Ref                        | Ref                        |
| CJR MSA                                             | 1.46*** [1.23,1.73]        | 1.88*** [1.68,2.10]        |
| <b>Year x MSA Treatment Status</b>                  |                            |                            |
| 2014 x CJR MSA                                      | 1.00 [0.97,1.03]           | 1.01 [0.99,1.03]           |
| 2015 x CJR MSA                                      | 1.03* [1.00,1.06]          | 1.01 [0.99,1.03]           |
| <b>Race-dual-eligibility</b>                        |                            |                            |
| White non-dual                                      | Ref                        | Ref                        |
| White dual                                          | 0.34*** [0.31,0.36]        | 0.41*** [0.39,0.43]        |
| Black non-dual                                      | 0.50*** [0.47,0.54]        | 0.53*** [0.51,0.56]        |
| Black dual                                          | 0.23*** [0.20,0.27]        | 0.25*** [0.23,0.27]        |
| Hispanic non-dual                                   | 0.25*** [0.18,0.35]        | 0.61*** [0.52,0.71]        |
| Hispanic dual                                       | 0.07*** [0.04,0.11]        | 0.59*** [0.52,0.66]        |
| <b>Year x Race-dual-eligibility</b>                 |                            |                            |
| 2014 x White dual                                   | 1.06 [0.96,1.18]           | 0.98 [0.91,1.05]           |
| 2014 x Black non-dual                               | 0.96 [0.87,1.05]           | 0.99 [0.94,1.06]           |
| 2014 x Black dual                                   | 0.92 [0.75,1.13]           | 1.12 [0.99,1.28]           |
| 2014 x Hispanic non-dual                            | 0.92 [0.56,1.52]           | 1.38** [1.12,1.69]         |
| 2014 x Hispanic dual                                | 2.00* [1.10,3.62]          | 1.05 [0.89,1.24]           |
| 2015 x White dual                                   | 1.03 [0.92,1.14]           | 0.95 [0.88,1.01]           |
| 2015 x Black non-dual                               | 1.09 [1.00,1.19]           | 1.08* [1.02,1.15]          |
| 2015 x Black dual                                   | 1.04 [0.85,1.27]           | 1.1 [0.97,1.25]            |
| 2015 x Hispanic non-dual                            | 1.14 [0.71,1.82]           | 1.15 [0.93,1.42]           |
| 2015 x Hispanic dual                                | 1.47 [0.78,2.78]           | 1.02 [0.87,1.21]           |
| <b>MSA Treatment Status x Race-dual-eligibility</b> |                            |                            |
| CJR MSA x White dual                                | 0.82*** [0.74,0.91]        | 0.90** [0.84,0.97]         |
| CJR MSA x Black non-dual                            | 1.15** [1.04,1.27]         | 1.19*** [1.12,1.27]        |
| CJR MSA x Black dual                                | 1.11 [0.90,1.36]           | 1.35*** [1.18,1.53]        |

|                                                               | <b>Hip Replacement</b>     | <b>Knee Replacement</b>    |
|---------------------------------------------------------------|----------------------------|----------------------------|
|                                                               | <i>Odds Ratio [95% CI]</i> | <i>Odds Ratio [95% CI]</i> |
| CJR MSA x Hispanic non-dual                                   | 1.1 [0.69,1.76]            | 1.03 [0.82,1.29]           |
| CJR MSA x Hispanic dual                                       | 1.91* [1.13,3.21]          | 1.02 [0.88,1.17]           |
| <b>Year x Treatment Status x Race-dual-eligibility</b>        |                            |                            |
| 2014 x CJR MSA x White dual                                   | 1 [0.86,1.16]              | 1.08 [0.98,1.19]           |
| 2014 x CJR MSA x Black non-dual                               | 1.01 [0.88,1.16]           | 0.97 [0.88,1.06]           |
| 2014 x CJR MSA x Black dual                                   | 1.27 [0.95,1.71]           | 0.97 [0.81,1.16]           |
| 2014 x CJR MSA x Hispanic non-dual                            | 1.28 [0.66,2.48]           | 0.89 [0.66,1.21]           |
| 2014 x CJR MSA x Hispanic dual                                | 0.49* [0.25,0.97]          | 0.99 [0.80,1.22]           |
| 2015 x CJR MSA x White dual                                   | 0.95 [0.82,1.11]           | 1.09 [0.99,1.20]           |
| 2015 x CJR MSA x Black non-dual                               | 0.94 [0.82,1.07]           | 0.98 [0.90,1.07]           |
| 2015 x CJR MSA x Black dual                                   | 0.95 [0.70,1.27]           | 0.97 [0.81,1.17]           |
| 2015 x CJR MSA x Hispanic non-dual                            | 1.15 [0.61,2.16]           | 1.11 [0.82,1.50]           |
| 2015 x CJR MSA x Hispanic dual                                | 0.82 [0.40,1.67]           | 1.01 [0.82,1.25]           |
|                                                               |                            |                            |
| N (patients)                                                  | 13,477,505                 | 13,477,505                 |
| N (MSAs)                                                      | 171                        | 171                        |
| p-value (Year x MSA Treatment Status)                         | 0.03                       | 0.56                       |
| p-value(Year x Race-dual-eligibility)                         | 0.07                       | 0.004                      |
| p-value (Year x MSA Treatment Status x Race-dual-eligibility) | 0.33                       | 0.77                       |

\* p<0.05, \*\* p<0.01, \*\*\* p<0.001

Abbreviations: CI: Confidence interval; MSA: Metropolitan Statistical Area; CJR: Comprehensive Care for Joint Replacement model; N: Number

Notes: Adjusted odds ratios from patient-level multivariable logistic regression models with robust/sandwich estimators of variance. The models controlled for age, sex, comorbidities, calendar year, MSA fixed effects, and MSA weights.

**eTable 6.** Full model estimates (adjusted odds ratios) from multivariable models examining the odds of undergoing hip or knee replacement surgeries before and after the Comprehensive Care for Joint Replacement model was implemented (2013-2017)

|                                                     | <b>Hip Replacements</b>    | <b>Knee Replacements</b>         |
|-----------------------------------------------------|----------------------------|----------------------------------|
|                                                     | <b>Odds Ratio [95% CI]</b> | <b>Odds Ratio [95% CI]</b>       |
|                                                     | Differential               | Differential                     |
| <b>MSA Treatment Status</b>                         |                            |                                  |
| Non-CJR MSA                                         | Ref                        | Ref                              |
| CJR MSA                                             | 1.54*** [1.33,1.79]        | 1.92*** [1.74,2.11] <sup>a</sup> |
| <b>CJR Phase</b>                                    |                            |                                  |
| Pre                                                 | Ref                        | Ref                              |
| Post                                                | 1.13*** [1.11,1.15]        | 1.02* [1.00,1.03]                |
| <b>MSA Treatment Status x Phase</b>                 |                            |                                  |
| CJR MSA x Post                                      | 0.99 [0.96,1.02]           | 1.02* [1.01,1.04]                |
| <b>Race-Dual</b>                                    |                            |                                  |
| White non-dual                                      | Ref                        | Ref                              |
| White dual                                          | 0.34*** [0.31,0.36]        | 0.42*** [0.40,0.44]              |
| Black non-dual                                      | 0.50*** [0.47,0.54]        | 0.54*** [0.51,0.56]              |
| Black dual                                          | 0.23*** [0.20,0.27]        | 0.25*** [0.23,0.27] <sup>a</sup> |
| Hispanic non-dual                                   | 0.25*** [0.18,0.35]        | 0.61*** [0.52,0.71]              |
| Hispanic dual                                       | 0.07*** [0.04,0.11]        | 0.59*** [0.53,0.66]              |
| <b>MSA Treatment Status x Race-Dual</b>             |                            |                                  |
| CJR MSA x White dual-eligible                       | 0.82*** [0.73,0.91]        | 0.90** [0.84,0.96]               |
| CJR MSA x Black non-dual-eligible                   | 1.16** [1.05,1.28]         | 1.20*** [1.12,1.28]              |
| CJR MSA x Black dual-eligible                       | 1.11 [0.90,1.37]           | 1.35*** [1.19,1.54]              |
| CJR MSA x Hispanic non-dual-eligible                | 1.10 [0.69,1.76]           | 1.03 [0.82,1.28]                 |
| CJR MSA x Hispanic dual-eligible                    | 1.90* [1.13,3.20]          | 1.01 [0.87,1.16]                 |
| <b>CJR Phase x Race-Dual</b>                        |                            |                                  |
| Post x White dual-eligible                          | 1.12* [1.01,1.24]          | 1.00 [0.93,1.06]                 |
| Post x Black non-dual-eligible                      | 1.06 [0.97,1.15]           | 1.13*** [1.07,1.20]              |
| Post x Black dual-eligible                          | 1.09 [0.90,1.33]           | 1.21** [1.07,1.37]               |
| Post x Hispanic non-dual-eligible                   | 1.33 [0.86,2.07]           | 1.31** [1.07,1.60]               |
| Post x Hispanic dual-eligible                       | 2.27** [1.29,3.99]         | 1.05 [0.90,1.24]                 |
| <b>MSA Treatment Status x CJR Phase x Race-Dual</b> |                            |                                  |
| CJR MSA x Post x White dual-eligible                | 0.94 [0.81,1.08]           | 1.05 [0.96,1.16]                 |
| CJR MSA x Post x Black non-dual-eligible            | 0.94 [0.82,1.07]           | 0.84*** [0.77,0.92]              |
| CJR MSA x Post x Black dual-eligible                | 1.05 [0.79,1.40]           | 0.74** [0.62,0.90]               |
| CJR MSA x Post x Hispanic non-dual-eligible         | 0.92 [0.50,1.68]           | 0.88 [0.66,1.19]                 |
| CJR MSA x Post x Hispanic dual-eligible             | 0.49* [0.25,0.94]          | 1.10 [0.90,1.35]                 |
| <b>Age</b>                                          |                            |                                  |
|                                                     | 0.95*** [0.95,0.95]        | 0.94*** [0.94,0.94]              |
| <b>Sex</b>                                          |                            |                                  |
| Male                                                | Ref                        | Ref                              |
| Female                                              | 0.97*** [0.96,0.98]        | 1.11*** [1.10,1.12]              |

|                                                | Hip Replacements    | Knee Replacements   |
|------------------------------------------------|---------------------|---------------------|
|                                                | Odds Ratio [95% CI] | Odds Ratio [95% CI] |
|                                                | Differential        | Differential        |
| <b>Chronic conditions</b>                      |                     |                     |
| Acute myocardial infarction                    | 0.71*** [0.67,0.75] | 0.54*** [0.52,0.57] |
| Alzheimer's disease and its related dementias  | 0.46*** [0.45,0.47] | 0.43*** [0.42,0.43] |
| Anemia                                         | 4.51*** [4.47,4.56] | 3.82*** [3.79,3.85] |
| Asthma                                         | 1.31*** [1.29,1.33] | 1.54*** [1.52,1.55] |
| Atrial fibrillation                            | 1.07*** [1.05,1.08] | 1.10*** [1.09,1.12] |
| Benign prostatic hyperplasia                   | 1.52*** [1.49,1.54] | 1.61*** [1.60,1.63] |
| Breast cancer                                  | 1.24*** [1.22,1.27] | 1.27*** [1.26,1.29] |
| Cataract                                       | 0.93*** [0.92,0.94] | 0.97*** [0.96,0.98] |
| Chronic Kidney Disease                         | 0.72*** [0.71,0.72] | 0.74*** [0.73,0.74] |
| Chronic Obstructive Pulmonary Disease          | 0.86*** [0.85,0.88] | 0.71*** [0.70,0.72] |
| Colorectal cancer                              | 1.08*** [1.04,1.11] | 0.94*** [0.91,0.96] |
| Congestive Heart Failure                       | 0.64*** [0.63,0.65] | 0.62*** [0.61,0.62] |
| Depression                                     | 1.07*** [1.06,1.08] | 1.18*** [1.17,1.19] |
| Diabetes                                       | 0.60*** [0.59,0.61] | 0.78*** [0.77,0.78] |
| Endometrial cancer                             | 1.56*** [1.48,1.64] | 1.46*** [1.41,1.52] |
| Glaucoma                                       | 0.91*** [0.90,0.92] | 0.96*** [0.95,0.97] |
| Hyperlipidemia                                 | 1.39*** [1.38,1.41] | 1.51*** [1.50,1.53] |
| Hypertension                                   | 1.52*** [1.50,1.54] | 2.01*** [1.99,2.02] |
| Hypothyroidism                                 | 1.05*** [1.04,1.06] | 1.13*** [1.12,1.14] |
| Ischemic Heart Disease                         | 0.85*** [0.85,0.86] | 0.85*** [0.85,0.86] |
| Lung cancer                                    | 0.73*** [0.69,0.76] | 0.52*** [0.50,0.55] |
| Osteoporosis                                   | 1.14*** [1.12,1.15] | 1.03*** [1.02,1.04] |
| Prostate cancer                                | 1.31*** [1.28,1.34] | 1.25*** [1.23,1.27] |
| Stroke/ Transient ischemic attack              | 0.63*** [0.61,0.65] | 0.62*** [0.61,0.64] |
| <b>Year</b>                                    |                     |                     |
| 2013                                           | Ref                 | Ref                 |
| 2014                                           | 1.04*** [1.02,1.06] | 0.97*** [0.96,0.98] |
| 2015                                           | 1.05*** [1.03,1.07] | 0.96*** [0.95,0.98] |
| <b>Year x MSA Treatment Status</b>             |                     |                     |
| 2014 x CJR MSA                                 | 1.00 [0.97,1.03]    | 1.01 [0.99,1.03]    |
| 2015 x CJR MSA                                 | 1.03* [1.00,1.06]   | 1.01 [0.99,1.03]    |
| <b>Year x Race-Dual</b>                        |                     |                     |
| 2014 x White dual-eligible                     | 1.07 [0.96,1.18]    | 0.98 [0.92,1.05]    |
| 2014 x Black non-dual-eligible                 | 0.96 [0.87,1.05]    | 0.99 [0.94,1.06]    |
| 2014 x Black dual-eligible                     | 0.92 [0.75,1.13]    | 1.12 [0.99,1.28]    |
| 2014 x Hispanic non-dual-eligible              | 0.92 [0.56,1.52]    | 1.38** [1.12,1.69]  |
| 2014 x Hispanic dual-eligible                  | 2.00* [1.10,3.62]   | 1.05 [0.89,1.24]    |
| 2015 x White dual-eligible                     | 1.03 [0.93,1.14]    | 0.95 [0.89,1.01]    |
| 2015 x Black non-dual-eligible                 | 1.09 [1.00,1.19]    | 1.08* [1.02,1.15]   |
| 2015 x Black dual-eligible                     | 1.04 [0.85,1.27]    | 1.10 [0.97,1.25]    |
| 2015 x Hispanic non-dual-eligible              | 1.14 [0.71,1.82]    | 1.15 [0.93,1.42]    |
| 2015 x Hispanic dual-eligible                  | 1.48 [0.78,2.79]    | 1.03 [0.87,1.22]    |
| <b>Year x MSA Treatment Status x Race-Dual</b> |                     |                     |
| 2014 x CJR MSA x White dual-eligible           | 1.00 [0.86,1.16]    | 1.08 [0.98,1.19]    |

|                                             | <b>Hip Replacements</b>    | <b>Knee Replacements</b>   |
|---------------------------------------------|----------------------------|----------------------------|
|                                             | <b>Odds Ratio [95% CI]</b> | <b>Odds Ratio [95% CI]</b> |
|                                             | Differential               | Differential               |
| 2014 x CJR MSA x Black non-dual-eligible    | 1.01 [0.88,1.16]           | 0.97 [0.88,1.06]           |
| 2014 x CJR MSA x Black dual-eligible        | 1.27 [0.95,1.71]           | 0.97 [0.81,1.17]           |
| 2014 x CJR MSA x Hispanic non-dual-eligible | 1.29 [0.67,2.48]           | 0.89 [0.66,1.21]           |
| 2014 x CJR MSA x Hispanic dual-eligible     | 0.49* [0.25,0.97]          | 0.99 [0.80,1.22]           |
| 2015 x CJR MSA x White dual-eligible        | 0.95 [0.82,1.11]           | 1.09 [0.99,1.20]           |
| 2015 x CJR MSA x Black non-dual-eligible    | 0.94 [0.82,1.07]           | 0.98 [0.90,1.07]           |
| 2015 x CJR MSA x Black dual-eligible        | 0.95 [0.70,1.27]           | 0.97 [0.81,1.17]           |
| 2015 x CJR MSA x Hispanic non-dual-eligible | 1.15 [0.62,2.16]           | 1.11 [0.82,1.50]           |
| 2015 x CJR MSA x Hispanic dual-eligible     | 0.82 [0.40,1.66]           | 1.01 [0.82,1.24]           |
|                                             |                            |                            |
| N (beneficiary-year)                        | 18,403,141                 | 18,403,141                 |
| N (MSAs)                                    | 171                        | 171                        |
| p-value for triple interaction term         | 0.28                       | <0.001                     |

\* p<0.05, \*\* p<0.01, \*\*\* p<0.001

Abbreviations: CI: Confidence interval; MSA: Metropolitan Statistical Area; CJR: Comprehensive Care for Joint Replacement model; N: Number

Notes: Adjusted odds ratios from patient-level multivariable logistic regression models with triple differences estimation and robust/sandwich estimators of variance. The models also controlled for MSA fixed effects and MSA weights. The analysis excluded data from 2016 because the CJR was introduced in April 2016, and this implementation precludes the classification of all Medicare beneficiaries into a pre- and post-cohort. Fixed effect estimates for the 171 MSAs are not presented in this table. For the year estimate and the year interaction estimates, estimates for 2017 are omitted due to collinearity.

<sup>a</sup> Estimates used for supporting the pre-existing disparities between White non-dual-eligible beneficiaries and Black dual-eligible beneficiaries: Probability of knee replacements White dual-eligible beneficiaries in comparison to Black non-dual-eligible beneficiaries =  $1/(1.92 \times 0.25) = 2.08$

**eTable 7.** Sensitivity analyses (1-6) - the Comprehensive Care for Joint Replacement model's association with the probability of undergoing hip replacements with respect to White non-dual-eligible beneficiaries (2013-2017)

| Difference in adjusted probabilities of surgeries in comparison to White non-dual-eligible beneficiaries among CJR versus non-CJR MSAs <sup>a</sup> |                                   |                                    |                               |                                                  |                                            |                                                     |                                       |                                       |
|-----------------------------------------------------------------------------------------------------------------------------------------------------|-----------------------------------|------------------------------------|-------------------------------|--------------------------------------------------|--------------------------------------------|-----------------------------------------------------|---------------------------------------|---------------------------------------|
| Analysis                                                                                                                                            | Main Analysis: Triple Differences | Intention-to-treat analysis (SA 1) | RTI indicator for race (SA 2) | Medicare entitlement for dual-eligibility (SA 3) | 2016 included in the post-CJR phase (SA 4) | Medicare's definition for elective surgeries (SA 5) | Race interacted with key terms (SA 6) | Dual interacted with key terms (SA 6) |
|                                                                                                                                                     | %-point difference (95% CI)       | %-point difference (95% CI)        | %-point difference (95% CI)   | %-point difference (95% CI)                      | %-point difference (95% CI)                | %-point difference (95% CI)                         | %-point difference (95% CI)           | %-point difference (95% CI)           |
| N                                                                                                                                                   | 18,403,141                        | 19,875,207                         | 18,446,093                    | 18,403,141                                       | 23,239,775                                 | 18,411,681                                          | 18,403,141                            | 18,403,141                            |
| Hip Replacements                                                                                                                                    |                                   |                                    |                               |                                                  |                                            |                                                     |                                       |                                       |
| White dual                                                                                                                                          | -0.06<br>(-0.14, 0.01)            | -0.06<br>(-0.13, 0.01)             | -0.08*<br>(-0.16, -0.01)      | -0.06<br>(-0.14, 0.02)                           | -0.06<br>(-0.13, 0.01)                     | -0.08*<br>(-0.15, -0.01)                            |                                       |                                       |
| Black non-dual                                                                                                                                      | -0.05<br>(-0.16, 0.06)            | -0.07<br>(-0.17, 0.03)             | -0.05<br>(-0.16, 0.06)        | -0.05<br>(-0.15, 0.06)                           | -0.05<br>(-0.16, 0.05)                     | -0.05<br>(-0.16, 0.05)                              |                                       |                                       |
| Black dual                                                                                                                                          | 0.01<br>(-0.11, 0.13)             | 0.03<br>(-0.09, 0.14)              | 0.02<br>(-0.10, 0.14)         | 0.02<br>(-0.11, 0.14)                            | 0.01<br>(-0.10, 0.12)                      | 0.01<br>(-0.11, 0.13)                               |                                       |                                       |
| Hispanic non-dual                                                                                                                                   | -0.001<br>(-0.29, 0.29)           | 0.01<br>(-0.29, 0.28)              | -0.07<br>(-0.20, 0.07)        | -0.01<br>(-0.29, 0.26)                           | 0.00<br>(-0.27, 0.27)                      | -0.02<br>(-0.31, 0.26)                              |                                       |                                       |
| Hispanic dual                                                                                                                                       | -0.14<br>(-0.29, 0.01)            | -0.13<br>(-0.26, 0.001)            | -0.02<br>(-0.12, 0.07)        | -0.13<br>(-0.28, 0.01)                           | -0.12<br>(-0.25, 0.01)                     | -0.17*<br>(-0.32, -0.02)                            |                                       |                                       |
| Black                                                                                                                                               |                                   |                                    |                               |                                                  |                                            |                                                     | -0.03<br>(-0.12, 0.07)                |                                       |
| Hispanic                                                                                                                                            |                                   |                                    |                               |                                                  |                                            |                                                     | -0.11<br>(-0.32, 0.10)                |                                       |
| Dual                                                                                                                                                |                                   |                                    |                               |                                                  |                                            |                                                     |                                       | -0.05<br>(-0.11, 0.02)                |

\* p<0.05, \*\* p<0.01, \*\*\* p<0.001

Abbreviations: MSA: Metropolitan Statistical Area; CJR: Comprehensive Care for Joint Replacement model; SA: Sensitivity analysis; RTI: Research Triangle Institute; CI: Confidence interval; N: Number; %: Percentage

Notes: Adjusted probabilities from patient-level multivariable logistic regression models with robust/sandwich estimators of variance. The models assessed CJR's association with the probability of surgeries for each race/dual group (versus White non-dual-eligible beneficiaries) in CJR MSAs versus non-CJR MSAs. The models controlled for age, sex, comorbidities, calendar year (and interactions with CJR MSA indicator and race/dual-eligibility indicator), MSA fixed effects, and MSA weights. The probabilities and the change in probabilities were obtained using Stata's margins and lincom commands.

<sup>a</sup> Percentage point difference in the probability of surgeries for each race/dual group (versus White non-dual-eligible beneficiaries) in CJR MSAs with CJR implementation versus non-CJR MSAs ("triple difference").



**eTable 8.** Sensitivity analyses (1-6) - the Comprehensive Care for Joint Replacement model's association with the probability of undergoing knee replacements with respect to White non-dual-eligible beneficiaries (2013-2017)

| Difference in adjusted probabilities of surgeries in comparison to White non-dual-eligible beneficiaries among CJR versus non-CJR MSAs <sup>a</sup> |                                   |                                    |                               |                                                  |                                            |                                                     |                                       |                                       |
|-----------------------------------------------------------------------------------------------------------------------------------------------------|-----------------------------------|------------------------------------|-------------------------------|--------------------------------------------------|--------------------------------------------|-----------------------------------------------------|---------------------------------------|---------------------------------------|
| Analysis                                                                                                                                            | Main Analysis: Triple Differences | Intention-to-treat analysis (SA 1) | RTI indicator for race (SA 2) | Medicare entitlement for dual-eligibility (SA 3) | 2016 included in the post-CJR phase (SA 4) | Medicare's definition for elective surgeries (SA 5) | Race interacted with key terms (SA 6) | Dual interacted with key terms (SA 6) |
|                                                                                                                                                     | %-point difference (95% CI)       | %-point difference (95% CI)        | %-point difference (95% CI)   | %-point difference (95% CI)                      | %-point difference (95% CI)                | %-point difference (95% CI)                         | %-point difference (95% CI)           | %-point difference (95% CI)           |
| N                                                                                                                                                   | 18,403,141                        | 19,875,207                         | 18,446,093                    | 18,403,141                                       | 23,239,775                                 | 18,411,681                                          | 18,403,141                            | 18,403,141                            |
| Knee Replacements                                                                                                                                   |                                   |                                    |                               |                                                  |                                            |                                                     |                                       |                                       |
| White dual                                                                                                                                          | 0.01<br>(-0.10, 0.12)             | 0.02<br>(-0.09, 0.12)              | -0.03<br>(-0.15, 0.09)        | 0.02<br>(-0.10, 0.13)                            | 0.01<br>(-0.10, 0.12)                      | -0.02<br>(-0.13, 0.10)                              |                                       |                                       |
| Black non-dual                                                                                                                                      | -0.25**<br>(-0.40, -0.10)         | -0.21**<br>(-0.35, -0.07)          | -0.24**<br>(-0.39, -0.09)     | -0.24**<br>(-0.38, -0.09)                        | -0.24**<br>(-0.39, -0.09)                  | -0.25*<br>(-0.40, -0.10)                            |                                       |                                       |
| Black dual                                                                                                                                          | -0.27**<br>(-0.45, -0.10)         | -0.24*<br>(-0.40, -0.07)           | -0.30*<br>(-0.47, -0.13)      | -0.31*<br>(-0.48, -0.13)                         | -0.27*<br>(-0.44, -0.10)                   | -0.28*<br>(-0.45, -0.11)                            |                                       |                                       |
| Hispanic non-dual                                                                                                                                   | -0.04<br>(-0.65, 0.57)            | -0.12<br>(-0.70, 0.46)             | -0.01<br>(-0.25, 0.24)        | -0.01<br>(-0.60, 0.58)                           | -0.04<br>(-0.62, 0.53)                     | -0.03<br>(-0.64, 0.58)                              |                                       |                                       |
| Hispanic dual                                                                                                                                       | 0.23<br>(-0.10, 0.55)             | 0.33*<br>(0.02, 0.64)              | 0.29*<br>(0.07, 0.51)         | 0.21<br>(-0.12, 0.54)                            | 0.22<br>(-0.09, 0.53)                      | 0.25<br>(-0.07, 0.58)                               |                                       |                                       |
| Black                                                                                                                                               |                                   |                                    |                               |                                                  |                                            |                                                     | -0.28***<br>(-0.41, -0.15)            |                                       |
| Hispanic                                                                                                                                            |                                   |                                    |                               |                                                  |                                            |                                                     | 0.13<br>(-0.29, 0.55)                 |                                       |
| Dual                                                                                                                                                |                                   |                                    |                               |                                                  |                                            |                                                     |                                       | -0.02<br>(-0.12, 0.08)                |

\* p<0.05, \*\* p<0.01, \*\*\* p<0.001

Abbreviations: MSA: Metropolitan Statistical Area; CJR: Comprehensive Care for Joint Replacement model; SA: Sensitivity analysis; RTI: Research Triangle Institute; CI: Confidence interval; N: Number; %: Percentage

Notes: Adjusted probabilities from patient-level multivariable logistic regression models with robust/sandwich estimators of variance. The models assessed CJR's association with the probability of surgeries for each race/dual group (versus White non-dual-eligible beneficiaries) in CJR MSAs versus non-CJR MSAs. The models controlled for age, sex, comorbidities, calendar year (and interactions with CJR MSA indicator and race/dual-eligibility indicator), MSA fixed effects, and MSA weights. The probabilities and the change in probabilities were obtained using Stata's margins and lincom commands.

<sup>a</sup> Percentage point difference in the probability of surgeries for each race/dual group (versus White non-dual-eligible beneficiaries) in CJR MSAs with CJR implementation versus non-CJR MSAs ("triple difference").

**eTable 9.** Sensitivity analysis (7) – the Comprehensive Care for Joint Replacement model’s effect on the probability of undergoing surgery in the MSA of residence

| <b>Difference in the adjusted probabilities of undergoing surgeries in MSA of residence with CJR implementation</b> |                                        |                                        |
|---------------------------------------------------------------------------------------------------------------------|----------------------------------------|----------------------------------------|
|                                                                                                                     | <b>Hip Replacement</b>                 | <b>Knee Replacement</b>                |
|                                                                                                                     | <i>%-point difference<br/>(95% CI)</i> | <i>%-point difference<br/>(95% CI)</i> |
| N                                                                                                                   | 90,935                                 | 173,310                                |
| White non-dual                                                                                                      | 0.44 (-0.05, 0.92)                     | -0.46* (-0.82, -0.10)                  |
| White dual                                                                                                          | 0.14 (-1.90, 2.18)                     | -1.42* (-2.79, -0.04)                  |
| Black non-dual                                                                                                      | 0.79 (-0.90, 2.48)                     | 0.32 (-0.73, 1.37)                     |
| Black dual                                                                                                          | 0.22 (-3.52, 3.95)                     | 0.11 (-2.22, 2.44)                     |
| Hispanic non-dual                                                                                                   | 3.79 (-3.58, 11.17)                    | -0.42 (-4.10, 3.26)                    |
| Hispanic dual                                                                                                       | -0.64 (-5.86, 4.59)                    | 0.54 (-1.21, 2.29)                     |

\* p<0.05, \*\* p<0.01, \*\*\* p<0.001

Abbreviations: CJR: Comprehensive Care for Joint Replacement model; MSA: Metropolitan Statistical Area; CI: Confidence interval; N: Number; %: Percentage

Notes: Cohort is limited to beneficiaries residing in CJR MSAs. Adjusted probabilities from patient-level multivariable logistic regression models with robust/sandwich estimators of variance. Outcome was a binary indicator of whether the patient underwent surgery in the MSA of residence among CJR MSAs. The key independent variables were the CJR phase, the race/dual-eligibility indicator, and the interaction between these variables. The models controlled for age, sex, comorbidities, calendar year, MSA fixed effects, and MSA weights. The differences in probabilities were obtained using Stata’s lincom command.

## eReferences

1. Research Data Assistance Center (ResDAC). MedPAR RIF. <https://www.resdac.org/cms-data/files/medpar>. Accessed 03/15, 2021.
2. Barnett ML, Wilcock A, McWilliams JM, et al. Two-year evaluation of mandatory bundled payments for joint replacement. *N Engl J Med*. 2019;380(3):252-262.
3. Rudasill SE, Dattilo JR, Liu J, Kamath AF. Hemiarthroplasty or Total Hip Arthroplasty: Is There a Racial Bias in Treatment Selection for Femoral Neck Fractures?. *Geriatric orthopaedic surgery & rehabilitation*. 2019;10:2151459319841741.
4. Centers for Medicare and Medicaid Services. Bundled Payments for Care Improvement. <https://innovation.cms.gov/innovation-models/bundled-payments>. Accessed 03/15, 2021.
5. Chronic Condition Data Warehouse. Options for determining which CMS Medicare beneficiaries are dually eligible for Medicare and Medicaid benefits—A technical guidance paper. <https://www.resdac.org/sites/resdac.umn.edu/files/ccw-technical-guidance-options-for-determining-dually-eligibles.pdf>. Accessed 03/15, 2021.
6. Ryan AM, Kontopantelis E, Linden A, Burgess Jr JF. Now trending: Coping with non-parallel trends in difference-in-differences analysis. *Stat Methods Med Res*. 2019;28(12):3697-3711.
7. Dimick JB, Nicholas LH, Ryan AM, Thumma JR, Birkmeyer JD. Bariatric surgery complications before vs after implementation of a national policy restricting coverage to centers of excellence. *JAMA*. 2013;309(8):792-799.
8. Kahn JM, Davis BS, Yabes JG, et al. Association between state-mandated protocolized sepsis care and in-hospital mortality among adults with sepsis. *JAMA*. 2019;322(3):240-250.
9. Jarrín OF, Nyandege AN, Grafova IB, Dong X, Lin H. Validity of Race and Ethnicity Codes in Medicare Administrative Data Compared With Gold-standard Self-reported Race Collected During Routine Home Health Care Visits. *Med Care*. 2020;58(1):e1-e8.
10. Eicheldinger C, Bonito A. More accurate racial and ethnic codes for Medicare administrative data. *Health Care Financ Rev*. 2008;29(3):27.
11. Centers for Medicare and Medicaid Services. 2019 Procedure-Specific Complication Measure Updates and Specifications: THA/TKA. <https://www.qualitynet.org/dcs/ContentServer?c=Page&pagename=QnetPublic%2FPage%2FQnetTier4&cid=1228772782693>. Accessed 03/15, 2021.
12. Centers for Medicare and Medicaid Services. 2019 Procedure-Specific Readmission Measure Updates and Specification Report: Total Hip Arthroplasty and/or Total Knee Arthroplasty and Coronary Artery Bypass Graft. <https://www.qualitynet.org/dcs/ContentServer?c=Page&pagename=QnetPublic%2FPage%2FQnetTier4&cid=1219069855841>. Accessed 03/15, 2021.
13. The Lewin Group Inc. CMS Comprehensive Care for Joint Replacement Model: Performance Year 2 Evaluation Report - Appendices. <https://downloads.cms.gov/files/cmmi/cjr-secondannrpt-app.pdf>. Accessed 03/15, 2021.
14. StataCorp L. Stata 16 help for weight. <https://www.stata.com/help16.cgi?weight>. Accessed 03/15, 2021.
